# Supplementary material for: Transcription Factor GmERF105 Negatively Regulates Salt Stress Tolerance in Arabidopsis thaliana
Source: MDPI journal article supplement (doi:10.3390/plants12163007), 2023-08-21
Supplement: s1 [file s1]

Transcription Factor *GmERF105* Negatively Regulates Salt  
Stress Tolerance in *Arabidopsis thaliana*

**Lu Li, Zhen Zhu, Juan Liu, Yu Zhang, Yang Lu, Jinming Zhao\*, Han Xing\* and  
Na Guo\***

<sup>1</sup>National Center for Soybean Improvement, Key Laboratory of Biology and Genetics and Breeding for Soybean, Ministry of Agriculture, National Key Laboratory of Crop Genetics & Germplasm Enhancement and Utilization, College of Agriculture, Nanjing Agricultural University, Nanjing 210095, China

Additional files 1.

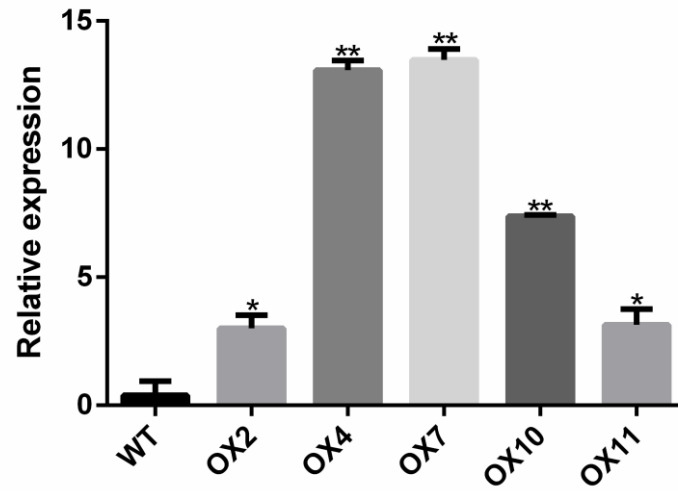

**Figure S1.** qRT-PCR identification of *GmERF105* transgenic lines.

WT: wild type of Arabidopsis Columbia-0; OX2, OX4, OX7, OX10, OX11: five transgenic lines of *GmERF105* in T<sub>3</sub> generation. The transcription level of *GmERF105* was analyzed by qRT-PCR using actin2 as the reference gene. Data are means  $\pm$  SD. Error bars represent the standard error of three replicates.

Additional files 2

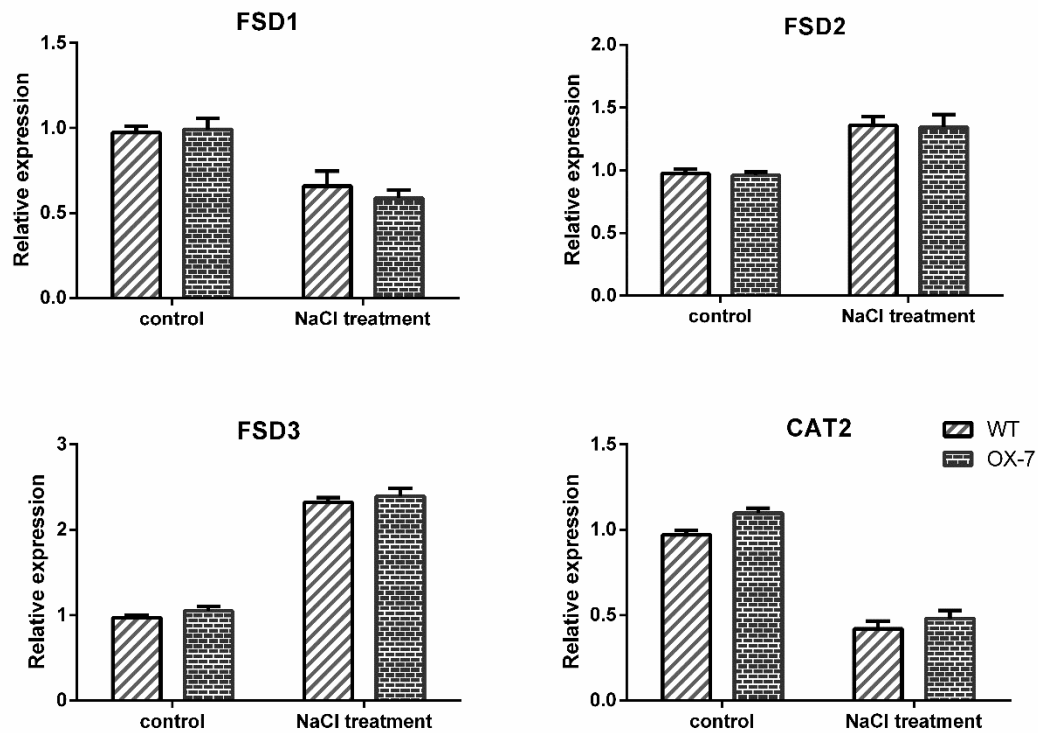

**Figure S2.** Transcription levels of FSDs and CAT2 in WT and *GmERF105* overexpressing plants

The wild-type controls and *GmERF105* transgenic lines plants were grown in pots for two weeks and then irrigated with a solution of 150 mM NaCl for 16 days. Samples were taken from the aboveground part of the Arabidopsis plant. The transcription levels of each gene were analyzed by qRT-PCR using *actin2* as the reference gene. Error bars represent  $\pm$  SD based on three replicates.

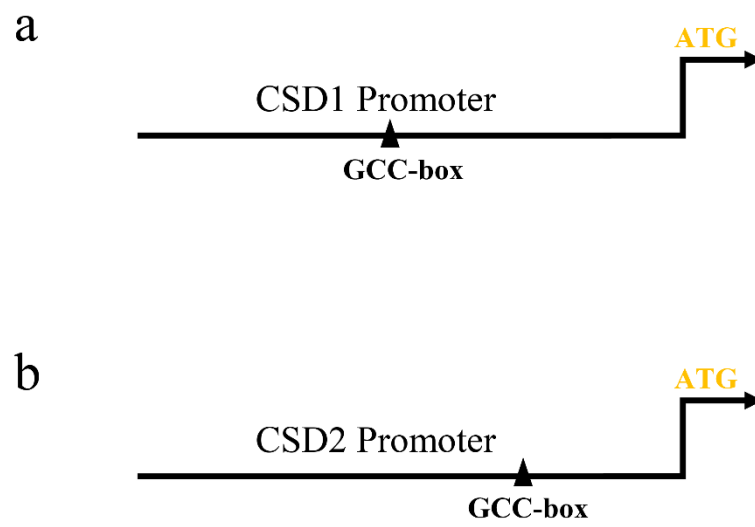

**Figure S3.** Promoter indicator diagram for *CDS1* and *CDS2*.

GCC-box was indicated by the black triangles.
